# Supplementary material for: Allele Age Estimation for Genetic Loci Associated with Autoinflammatory Diseases in Anatolia: Insights from Ancient and Modern DNA Analysis
Source: Research Square preprint supplement (doi:10.21203/rs.3.rs-6394549/v1), 2025-05-06
Supplement: Supplementary file 1 [file 8be511dad67fa8b89da1ef1d.docx]

**SUPPLEMENTARY**

**TABLE S1 Allele Frequencies of the SNPs in TUSEB and 1000 Genome Data Sets**

| SNP ID | Position | TÜSEB Frequency | 1000 Genome Frequency |
| --- | --- | --- | --- |
| rs10889664 | 67169792 | 0.35 | 0.323 |
| rs11117433 | 85985910 | 0.108 | 0.104 |
| rs12220700 | 62801746 | 0.412 | 0.261 |
| rs12525170 | 31131984 | 0.11 | 0.093 |
| rs1495965 | 67287825 | 0.485 | 0.534 |
| rs1518110 | 206771516 | 0.711 | 0.426 |
| rs1518111 | 206771300 | 0.712 | 0.427 |
| rs1660760 | 52394860 | 0.389 | 0.608 |
| rs17006292 | 121261187 | 0.011 | 0.048 |
| rs17482078 | 96783162 | 0.107 | 0.101 |
| rs17753641 | 159929885 | 0.053 | 0.028 |
| rs17810546 | 159947262 | 0.073 | 0.040 |
| rs1800871 | 206773289 | 0.706 | 0.435 |
| rs1874886 | 160011868 | 0.328 | 0.321 |
| rs2087726 | 46166818 | 0.661 | 0.652 |
| rs2121033 | 43900916 | 0.296 | 0.315 |
| rs2121034 | 43899730 | 0.294 | 0.314 |
| rs2230801 | 89772751 | 0.09 | 0.064 |
| rs224127 | 62701513 | 0.548 | 0.320 |
| rs2442736 | 31378844 | 0.208 | 0.144 |
| rs2617170 | 10408358 | 0.647 | 0.557 |
| rs2848479 | 98216871 | 0.426 | 0.439 |
| rs2848713 | 31416702 | 0.186 | 0.081 |
| rs3024490 | 206771966 | 0.706 | 0.438 |
| rs3783550 | 112775308 | 0.689 | 0.380 |
| rs4896243 | 137193653 | 0.618 | 0.274 |
| rs4947296 | 31090401 | 0.13 | 0.102 |
| rs4959053 | 31131800 | 0.111 | 0.093 |
| rs6660226 | 67278918 | 0.383 | 0.370 |
| rs681343 | 48703205 | 0.492 | 0.322 |
| rs7203487 | 85983088 | 0.859 | 0.102 |
| rs7574070 | 191145762 | 0.575 | 0.506 |
| rs7616215 | 46164194 | 0.661 | 0.652 |
| rs76830965 | 159919889 | 0.053 | 0.028 |
| rs7770216 | 31372834 | 0.29 | 0.315 |
| rs79556279 | 31362069 | 0.16 | 0.05 |
| rs897200 | 191153045 | 0.571 | 0.501 |
| rs913678 | 50338887 | 0.381 | 0.395 |
| rs924080 | 67294457 | 0.384 | 0.396 |
| rs9260997 | 29995539 | 0.864 | 0.932 |
| rs9266490 | 31372381 | 0.29 | 0.315 |
| rs104895081 | 3254268 | 0.002 | 0.000199680511182109 |
| rs104895085 | 3243529 | X | 0.000199680511182109 |
| rs104895094 | 3243403 | 0.007 | 0.002 |
| rs104895127 | 3254342 | X | 0.000199680511182109 |
| rs61732874 | 3243257 | 0.004 | 0.002 |
| rs4149584 | 6333477 | 0.012 | 0.006 |

**FIGURES S1 Genealogy Trees**

**
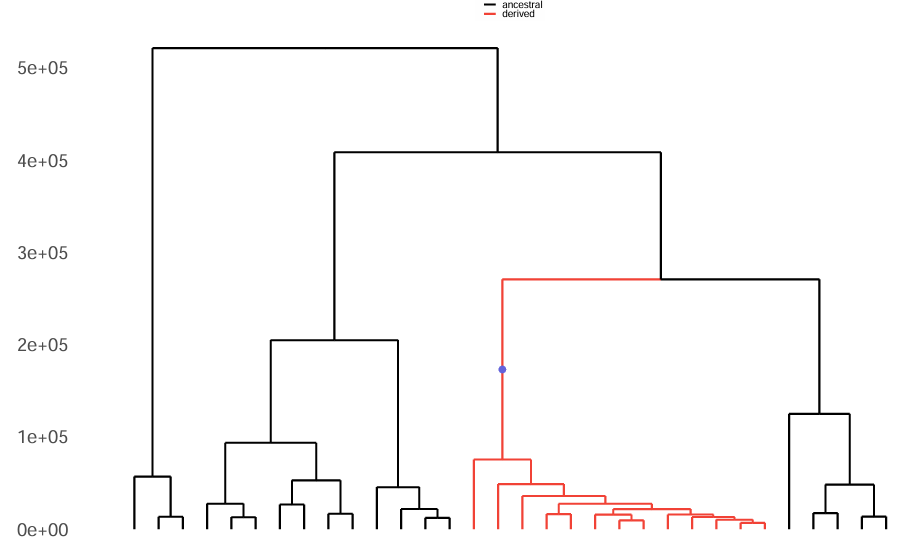
**

**rs924080 – Modern Anatolia**

**
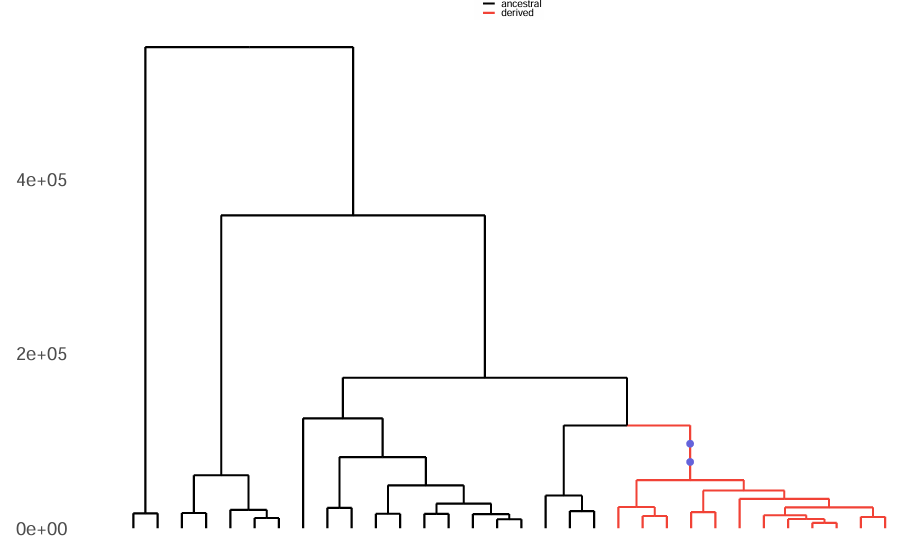
**

**rs1495965 – Modern Anatolia**

**
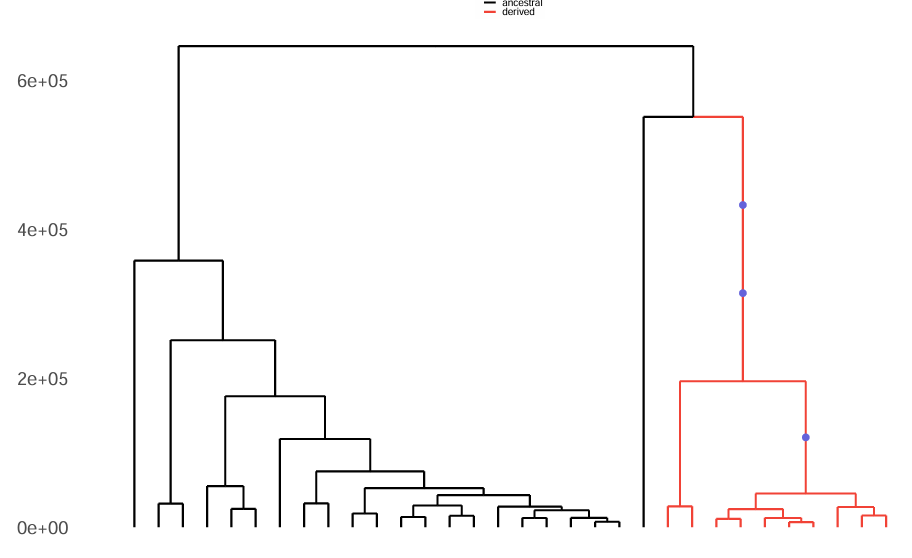
**

**rs1518110 – Modern Anatolia**

**
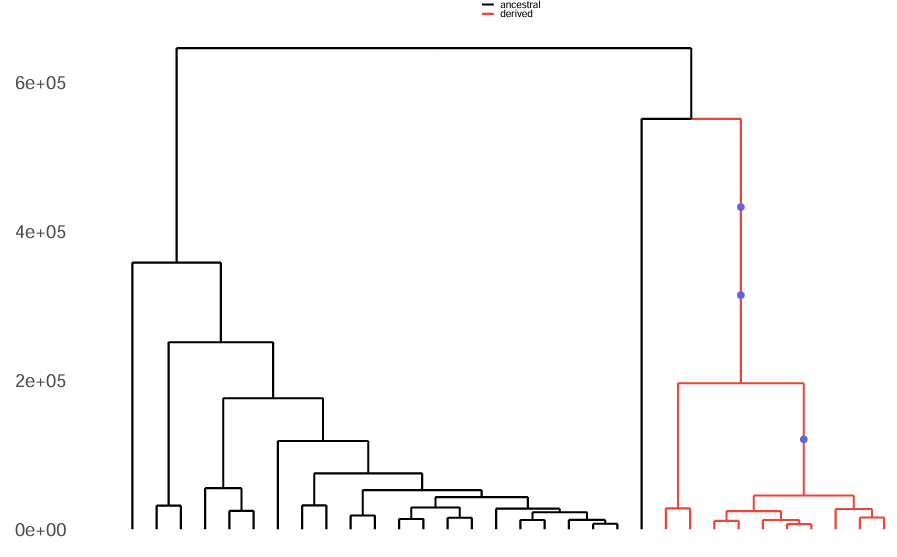
**

**rs1518111 – Modern Anatolia**

**
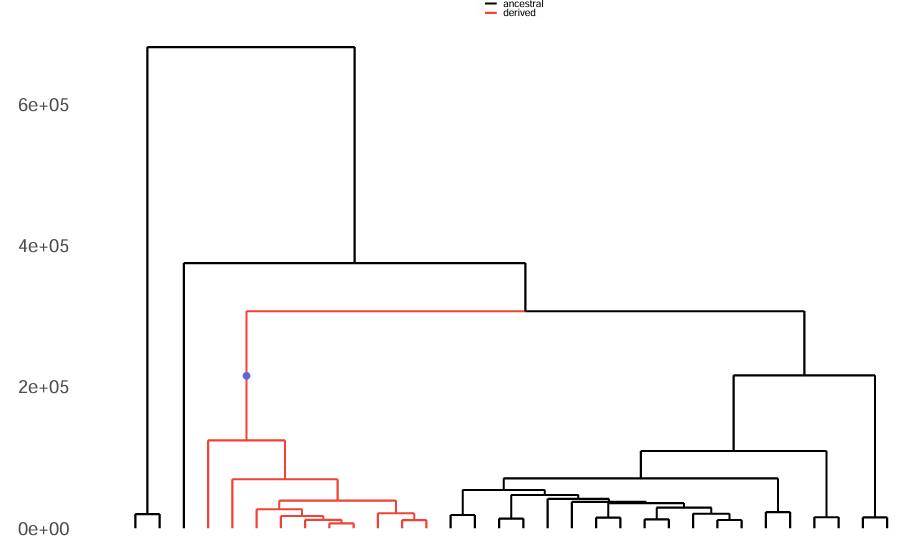
**

**rs1800871 - Modern Anatolia**

**
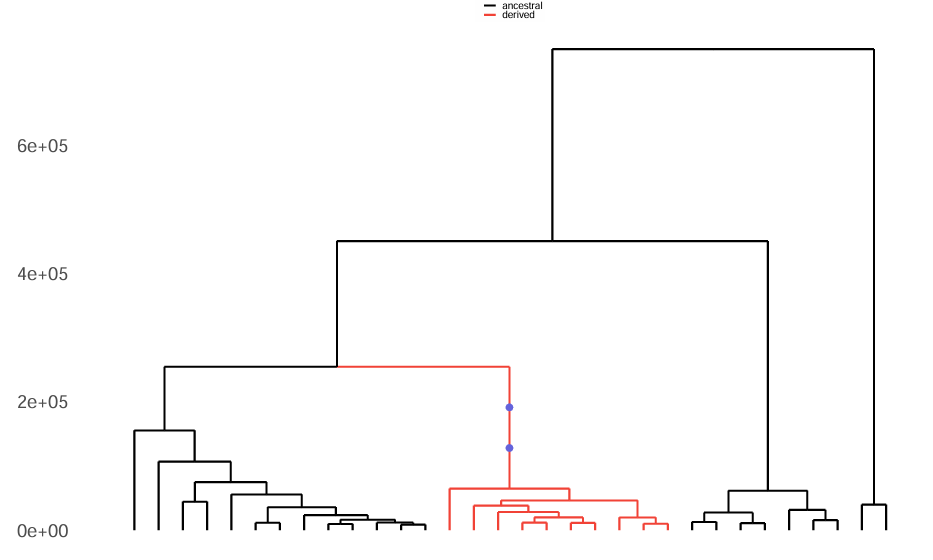
**

**rs3024490 - Modern Anatolia**

**
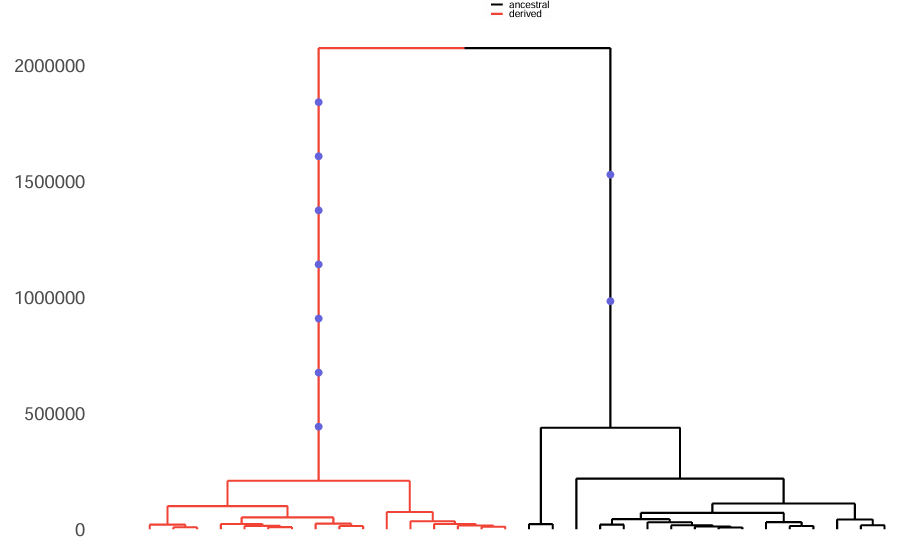
**

**rs897200 - Modern Anatolia**

**
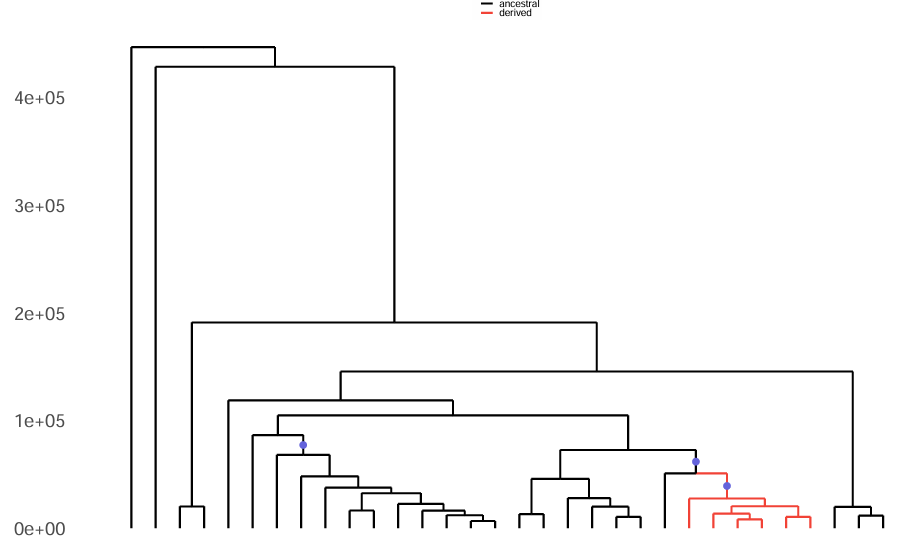
**

**rs3783550 - Modern Anatolia**

**
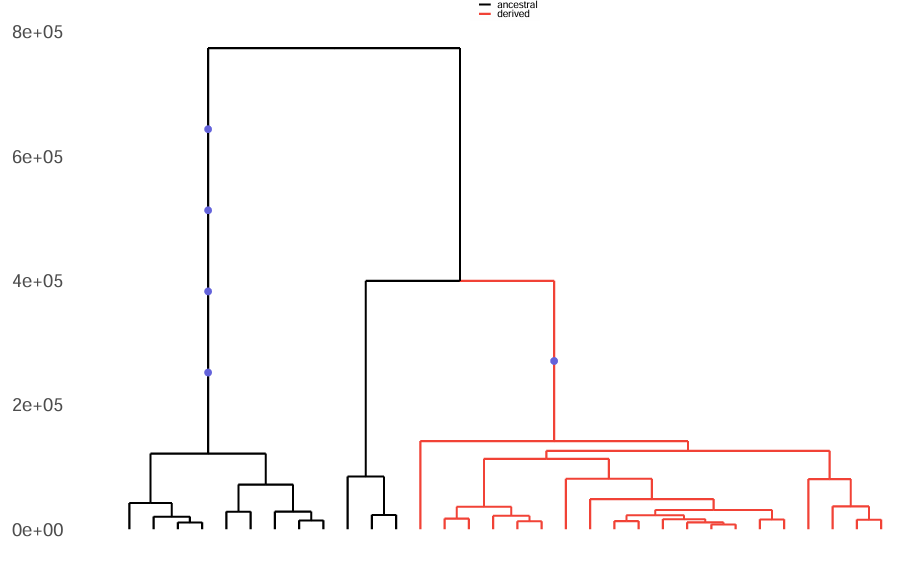
**

**rs7574070 - Modern Anatolia**

**
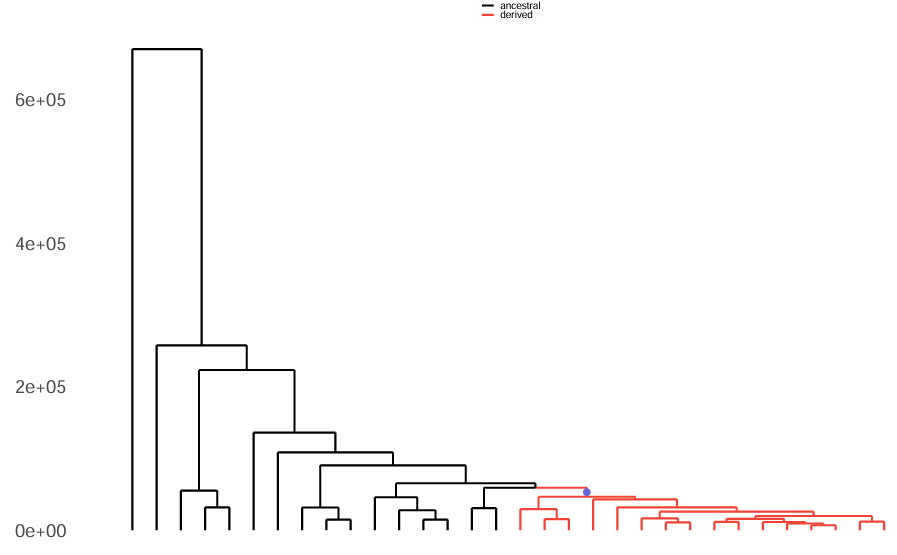
**

**rs76830965 - Modern Anatolia**

**
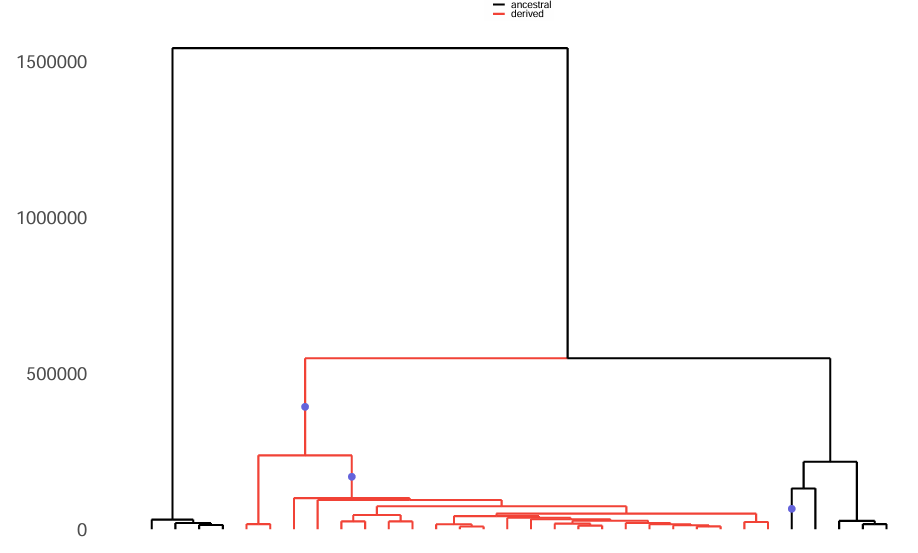
**

**rs2442736 - Modern Anatolia**

**
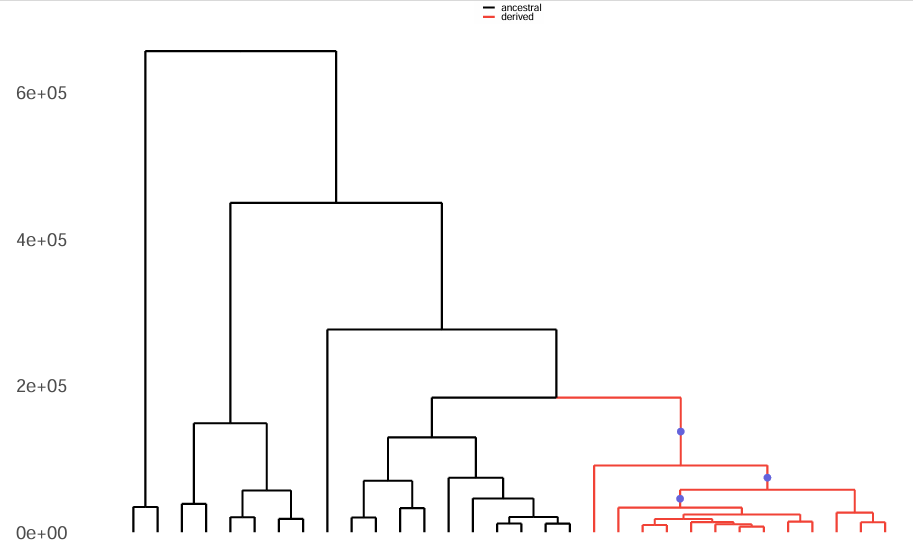
**

**rs4896243 - Modern Anatolia**

**
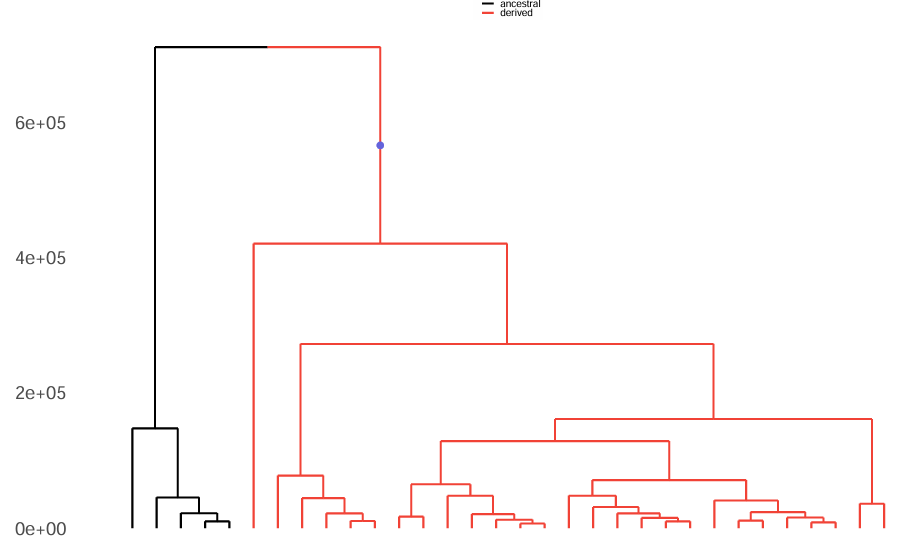
**

**rs4959053 - Modern Anatolia**

**
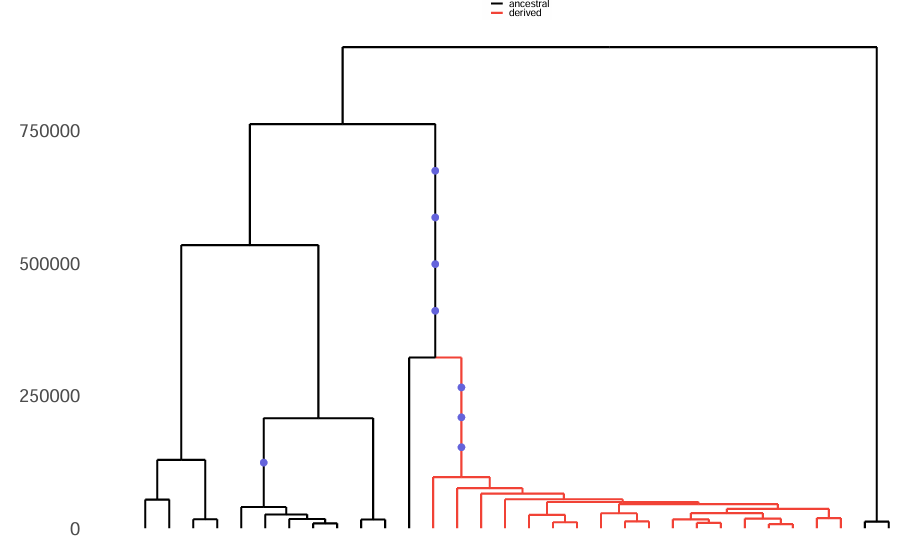
**

**rs9266490 - Modern Anatolia**

**
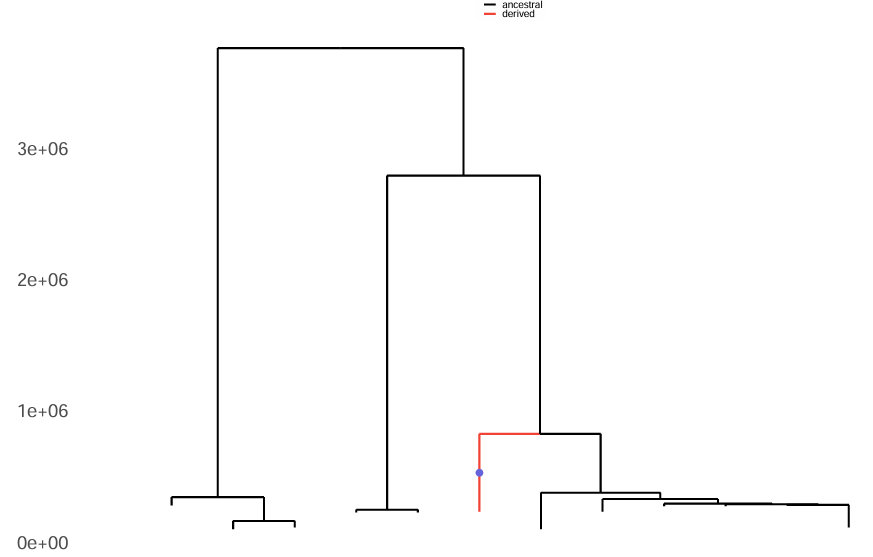
**

**rs2230801 – Ancient Anatolia**

**
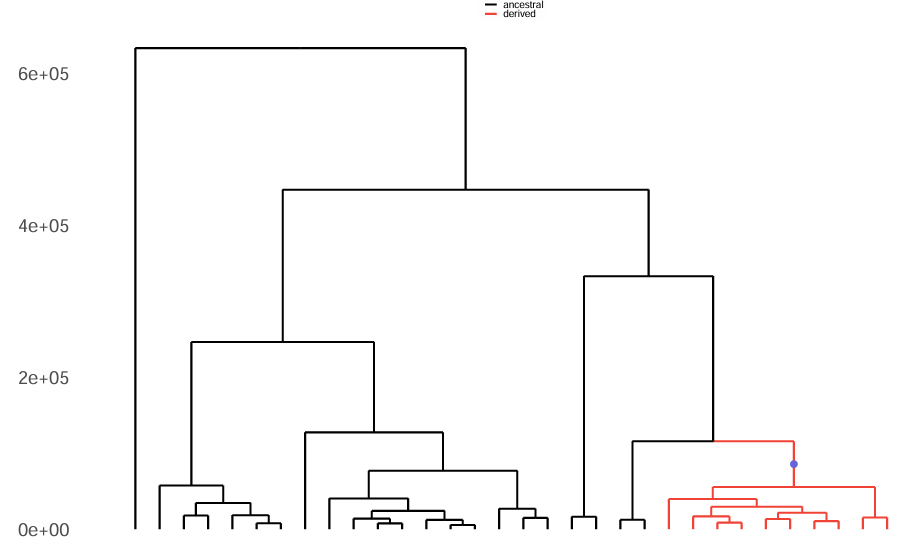
**

**rs224127 - Modern Anatolia**

**
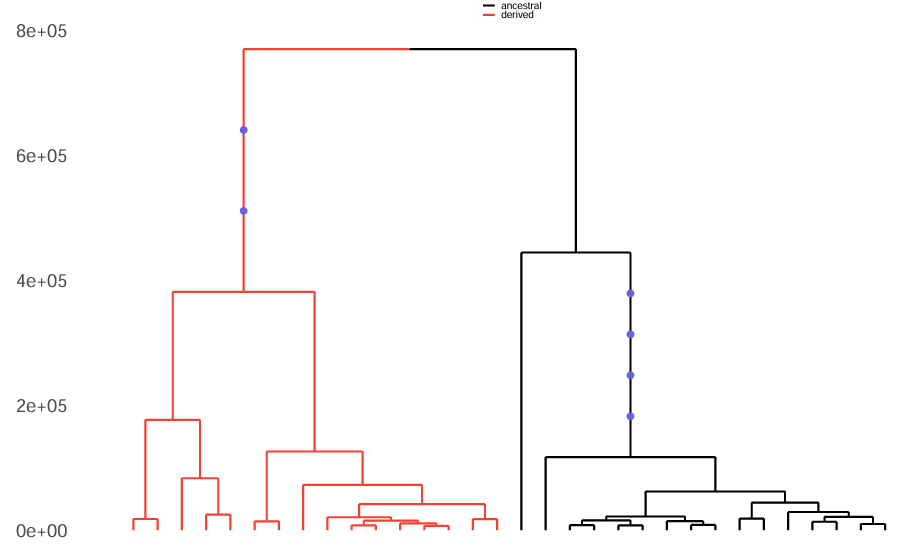
**

**rs1660760 - Modern Anatolia**

**
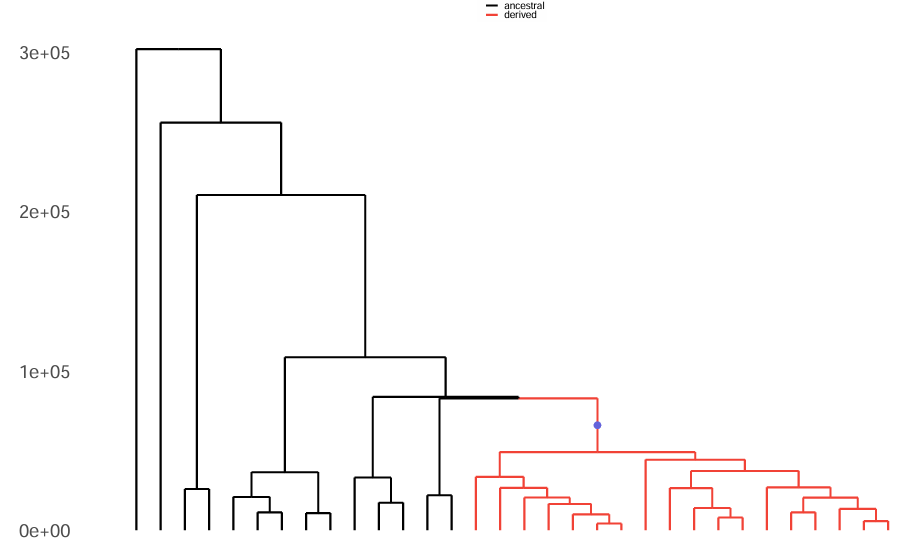
**

**rs12220700 - Modern Anatolia**

**
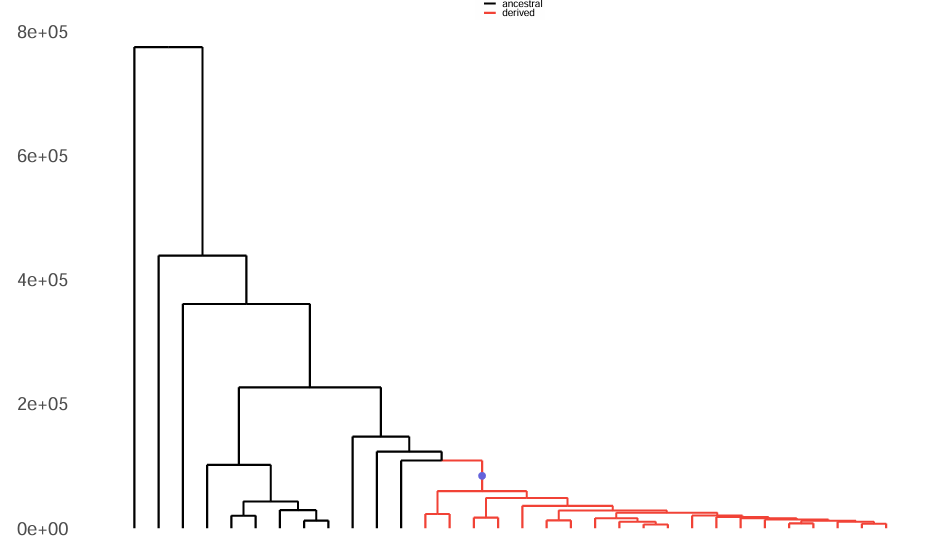
**

**rs2848479 - Modern Anatolia**

**
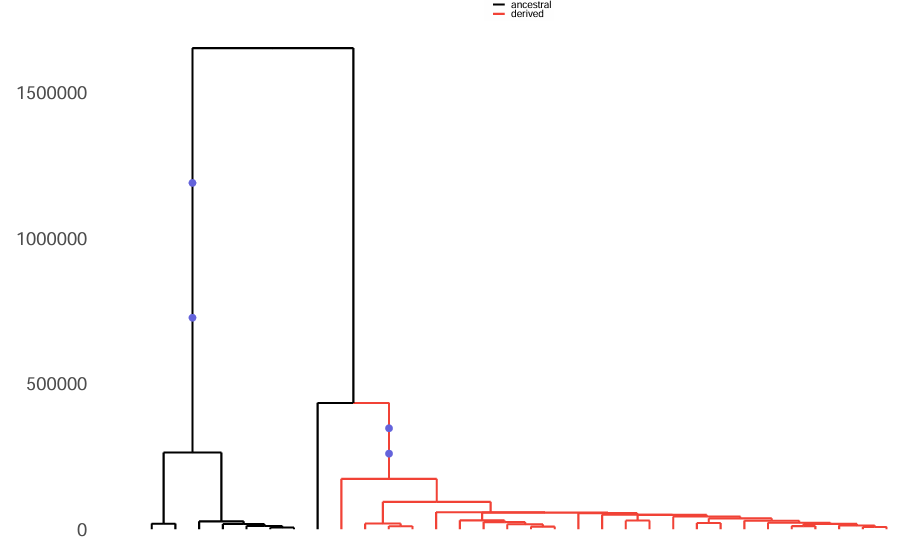
**

**rs2617170 - Modern Anatolia**

**
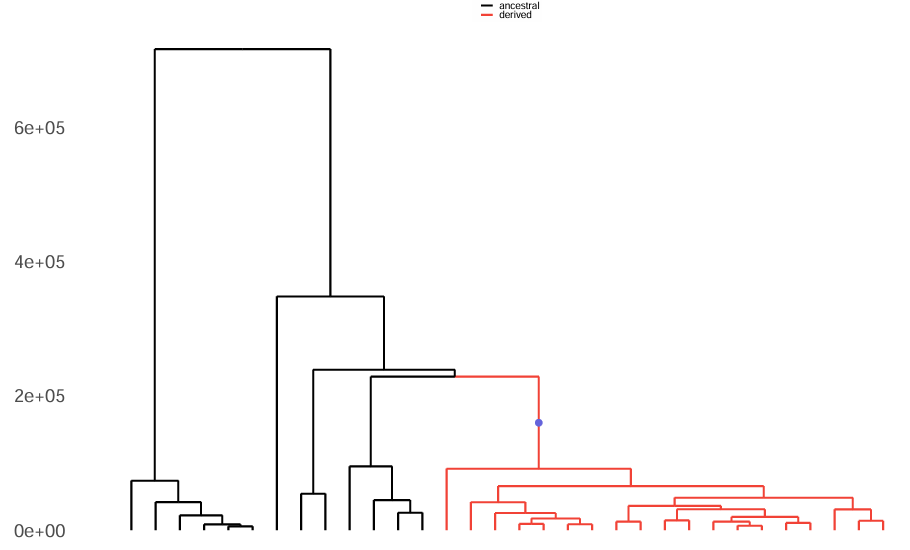
**

**rs4149584 - Modern Anatolia**

**
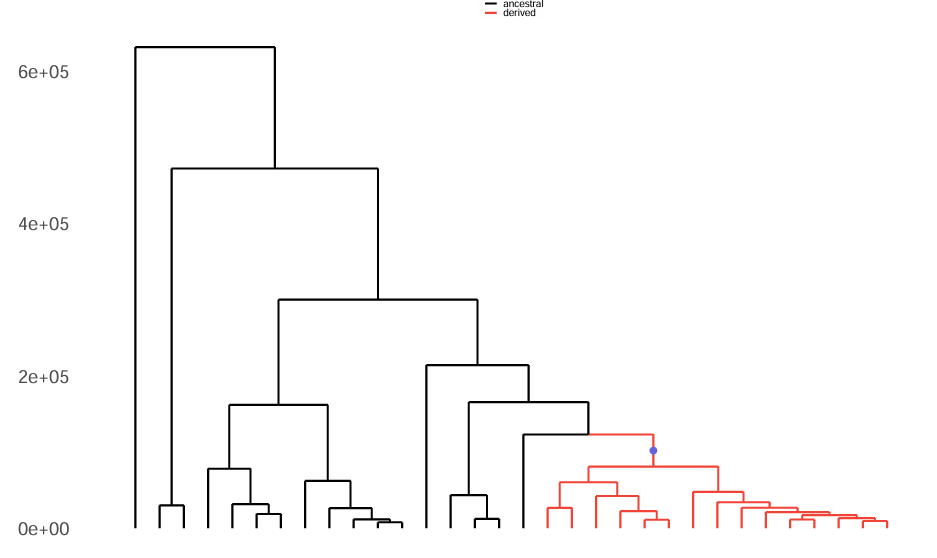
**

**rs2121034 - Modern Anatolia**

**
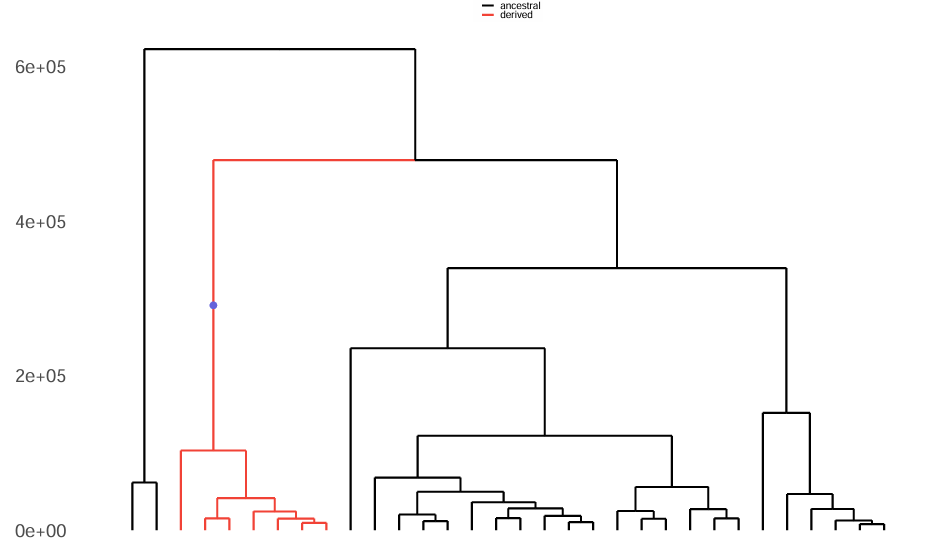
**

**rs7203487 - Modern Anatolia**

**
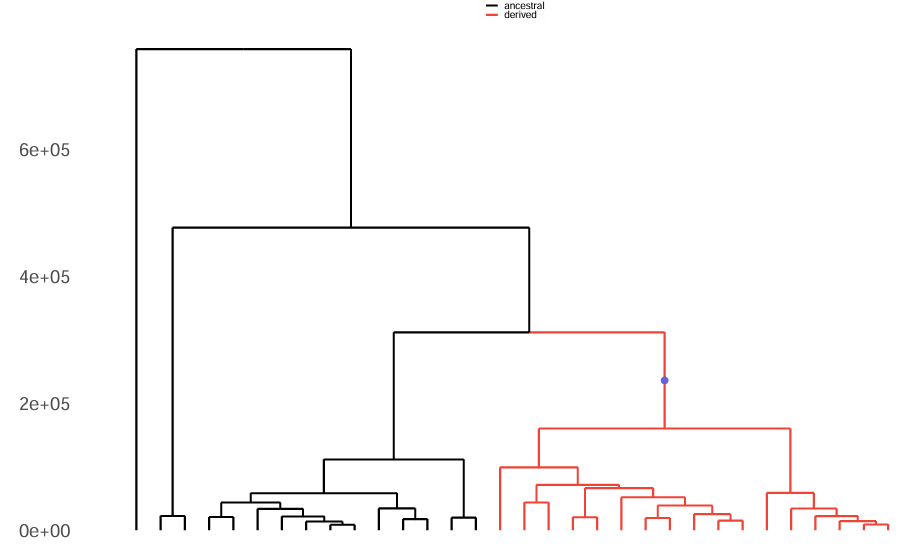
**

**rs11117433 - Modern Anatolia**

**
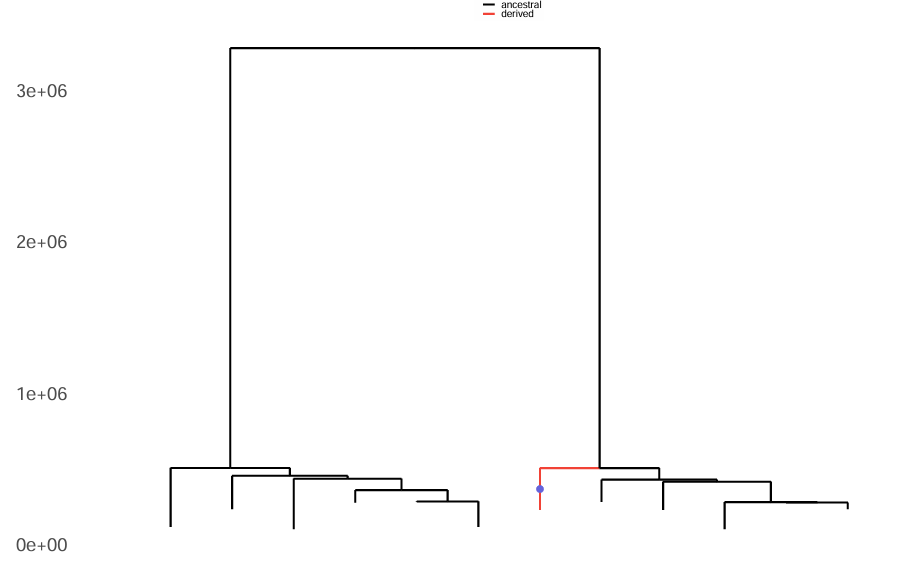
**

**rs61732874 – Ancient Anatolia**

**
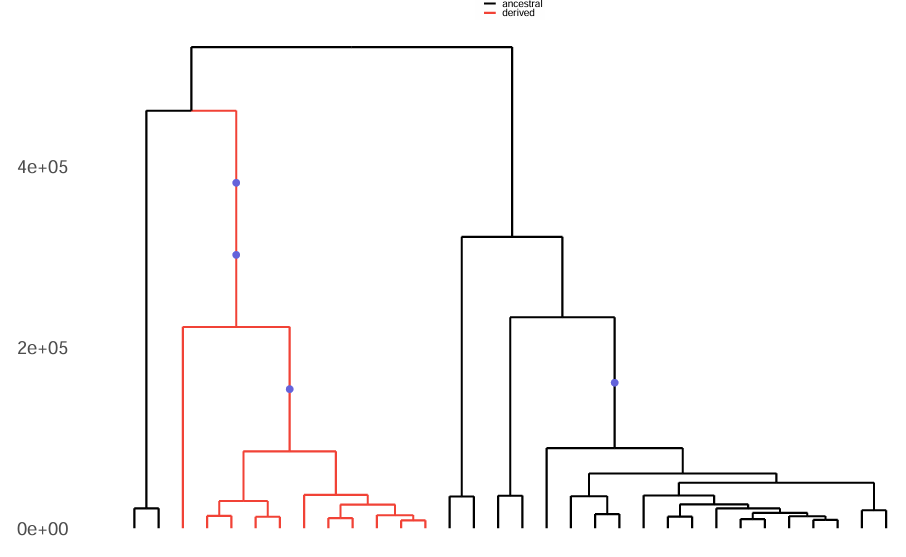
**

**rs913678 – Modern Anatolia**
